# Supplementary material
Source: publisher figshare collection journal article supplement (https://plos.figshare.com/articles/dataset/_/3248695)
Supplement: Supplementary file 1 [file 1]

Archive with 3 entries (3 files):
- S1 Table.PDF
- S2 Table.PDF
- S3 Table.PDF
