# Supplementary material
Source: publisher figshare collection journal article supplement (https://plos.figshare.com/articles/dataset/_/3248695)
Supplement: Supplementary file 1 [file 1 › S1 Table.PDF]

**S1 Table**

|                          | <b>Stereotypy form</b> |           |              |           |            |            |
|--------------------------|------------------------|-----------|--------------|-----------|------------|------------|
| <b>CD-1</b>              | <b>NS</b>              | <b>BM</b> | <b>CT-BM</b> | <b>CT</b> | <b>BF</b>  | <b>CIR</b> |
| At the time of screening | 20                     | 27        | 11           | 2         | 12         | 6          |
| At the time of testing   | 14                     | 24        | 7            | 0         | 9          | 6          |
| Used for analysis        | 8                      | 20        | 7            | 0         | 9          | 0          |
| <b>C57BL/6</b>           | <b>NS</b>              | <b>BM</b> | <b>RT-BM</b> | <b>RT</b> | <b>CIR</b> |            |
| At the time of screening | 20                     | 7         | 25           | 25        | 1          |            |
| At the time of testing   | 3                      | 4         | 46           | 7         | 0          |            |
| Used for analysis        | 0                      | 0         | 40           | 0         | 0          |            |

NS – no stereotypy,

BM – bar-mouthing,

RT – route-tracing,

BF – back-flipping,

CIR – circling,

CT-BM – cage top twirling and bar-mouthing,

RT-BM – route-tracing and bar-mouthing
