# Supplementary material
Source: publisher figshare collection journal article supplement (https://plos.figshare.com/articles/dataset/_/3248695)
Supplement: Supplementary file 1 [file 1 › S2 Table.PDF]

**S2 Table**

|                                  | <b>CD-1</b> | <b>C57BL/6</b> |
|----------------------------------|-------------|----------------|
| perseveration score              | 2 ± 1       | 3 ± 0.5        |
| repetitions                      | 13 ± 1      | 10 ± 1         |
| alternations                     | 10 ± 1      | 10 ± 1         |
| <i>p</i> making correct choice % | 52 ± 1      | 53 ± 1         |
| <i>p</i> displaying side bias %  | 48 ± 2      | 50 ± 2         |
