# Supplementary material
Source: publisher figshare collection journal article supplement (https://plos.figshare.com/articles/dataset/_/3248695)
Supplement: Supplementary file 1 [file 1 › S3 Table.PDF]

**S3 Table**

|                              | <b>training</b> | <b>testing</b> |
|------------------------------|-----------------|----------------|
| <b>CD-1</b>                  |                 |                |
| time in positive arms %      | 40 ± 1          | 22 ± 1         |
| time in negative arms %      | 24 ± 1          | 11 ± 1         |
| positive arm score           | 0.24 ± 0.02     | 0.34 ± 0.05    |
| time in reference arms %     | -               | 34 ± 1         |
| time in ambiguous arms %     | -               | 33 ± 1         |
| reference arm score          | -               | 0.01 ± 0.03    |
| time in near positive arms % | -               | 19 ± 0.2       |
| time in near negative arms % | -               | 15 ± 0.1       |
| ambiguous arm score          | -               | 0.12 ± 0.03    |
| number of arms entered       | 57 ± 1          | 73 ± 4         |
| reference arms entered %     | -               | 46 ± 1         |
| ambiguous arms entered %     | -               | 54 ± 1         |
| <b>C57BL/6</b>               |                 |                |
| time in positive arms %      | 36 ± 0.4        | 18 ± 1         |
| time in negative arms %      | 30 ± 0.5        | 14 ± 1         |
| positive arm score           | 0.09 ± 0.01     | 0.18 ± 0.04    |
| time in reference arms %     | -               | 33 ± 0.1       |
| time in ambiguous arms %     | -               | 41 ± 1         |
| reference arm score          | -               | - 0.12 ± 0.02  |
| time in near positive arms % | -               | 22 ± 1         |
| time in near negative arms % | -               | 19 ± 1         |
| ambiguous arm score          | -               | 0.08 ± 0.02    |
| number of arms entered       | 52 ± 1          | 59 ± 2         |
| reference arms entered %     | -               | 47 ± 1         |
| ambiguous arms entered %     | -               | 53 ± 1         |
